# Supplementary material for: Highly selective Ag foam gas diffusion electrodes for CO2 electroreduction by pulsed hydrogen bubble templation
Source: Royal Society of Chemistry journal article supplement (doi:10.1039/d3ey00220a), 2023-10-09
Supplement: d3ey00220a1.pdf [file d3ey00220a1.pdf]

## Supplementary Information

# Highly Selective Ag Foam Gas Diffusion Electrodes for CO<sub>2</sub> Electroreduction by Pulsed Hydrogen Bubble Templatation

Hendrik Hoffmann<sup>1\*</sup>, Maximilian Kutter<sup>1</sup>, Jens Osiewacz<sup>2</sup>, Melanie-Cornelia Paulisch-Rinke<sup>3</sup>, Steffen Lechner<sup>1</sup>, Barbara Ellendorff<sup>2</sup>, Annika Hilgert<sup>1</sup>, Ingo Manke<sup>3</sup>, Thomas Turek<sup>2</sup>, and Christina Roth<sup>1</sup>

<sup>1</sup>Electrochemical Process Engineering, Universität Bayreuth, Universitätsstraße 30, 95447 Bayreuth, Germany.

<sup>2</sup>Institute of Chemical and Electrochemical Process Engineering, Clausthal University of Technology, Leibnizstrasse 17, 38678 Clausthal-Zellerfeld, Germany.

<sup>3</sup>Helmholtz-Zentrum Berlin für Materialien und Energie, Department Electrochemical Energy Storage, Hahn-Meitner-Platz 1, 14109 Berlin, Germany

\*Corresponding author: [hendrik.hoffmann@uni-bayreuth.de](mailto:hendrik.hoffmann@uni-bayreuth.de)

## Methods

### Calculation of the Deposition Efficiency

The deposition efficiency of the Ag foam catalyst after Dynamic Hydrogen Bubble Templatation (DHBT) was calculated by equation (1), with  $n$  being the number of electrons being transferred during electrodeposition,  $F$  the Faraday constant,  $M_{Ag}$  the molar mass of Ag,  $I$  the deposition current and the deposition time  $t$ . The mass of the Ag catalysts before and after electrochemical deposition were calculated with respect to the total masses of the polymer substrates measured with a Kern ABT 220-5DM precision balance and a resolution of 0.01 mg. The samples were therefore dried in laboratory atmosphere at room temperature for 24 h.

$$Deposition\ Efficiency_{Ag} = \frac{m_{Ag}}{m_{theor.}} = \frac{m_{Ag} \cdot n \cdot F}{M_{Ag} \cdot I \cdot t} \quad (1)$$

### Liquid product analysis

Liquid products were analyzed by NMR spectroscopy from the anolyte and catholyte solutions after 100 h of electrolysis. NMR measurements were performed on a Bruker Avance 300 spectrometer. The solvent residual peak of DMSO-*d*6 (2.50 ppm) was taken as an internal standard for the <sup>1</sup>H-NMR spectra. The <sup>19</sup>F-NMR spectra were referenced to trichlorofluoromethane (CFCl<sub>3</sub>) as external standard. The evaluation of the spectra was done using MestReNova software version 10.0.2.

## DHBT process in galvanostatic mode

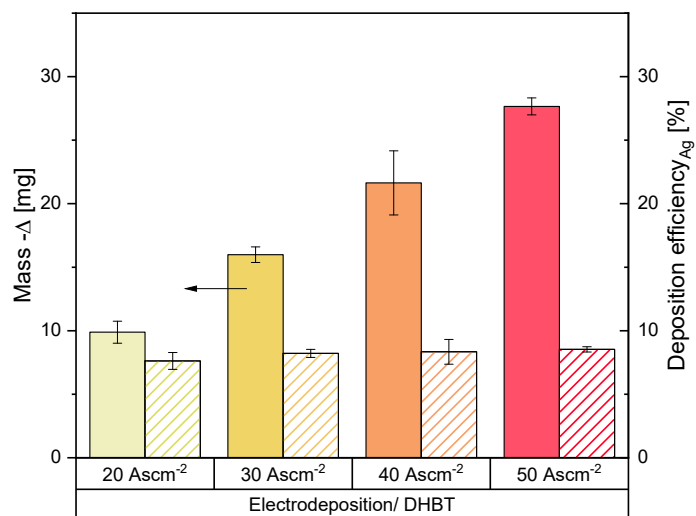

Figure 1: Deposited Ag mass and calculated Ag deposition efficiency of the DHBT foam electrodes with increasing charge densities during DC mode.

## Electrochemical cell, used for $CO_2RR$ of the Ag DHBT GDEs

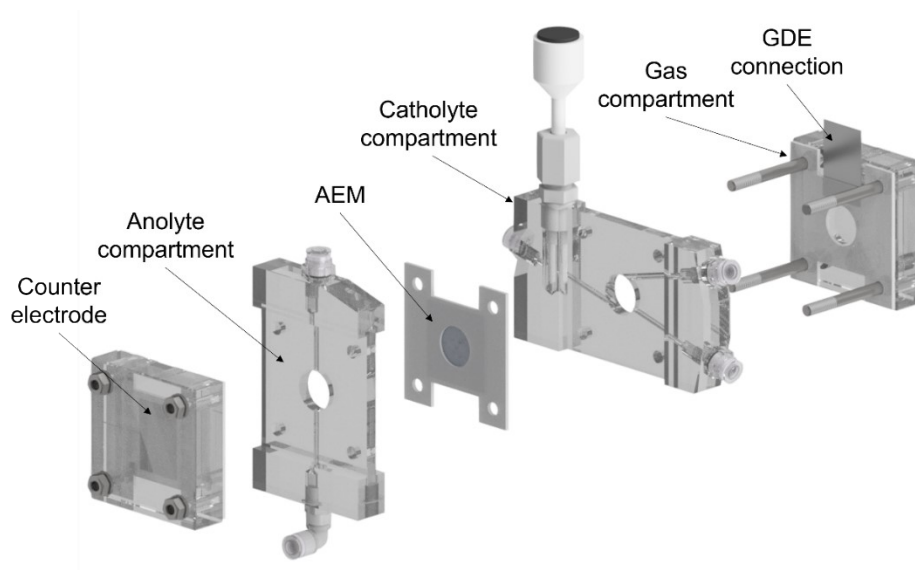

Figure 2: In-house built electrochemical flow cell for  $CO_2RR$  operation.

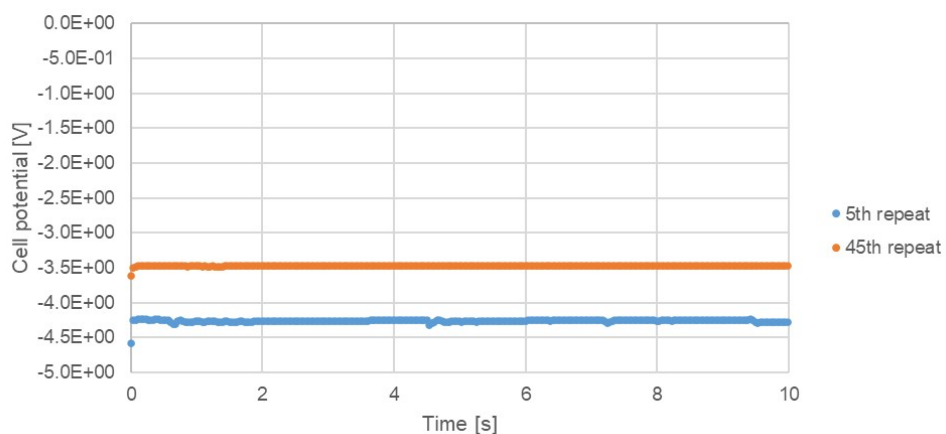

Figure 3: Cell potential during the fifth and the forty-fifth pulsating run.

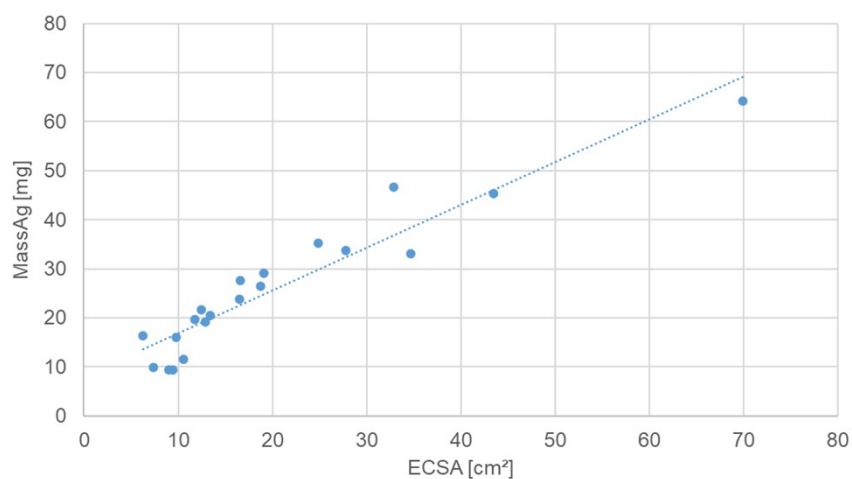

Figure 4: Correlation between the deposited Ag mass and the electrochemical surface area (ECSA) to establish a correlation factor.

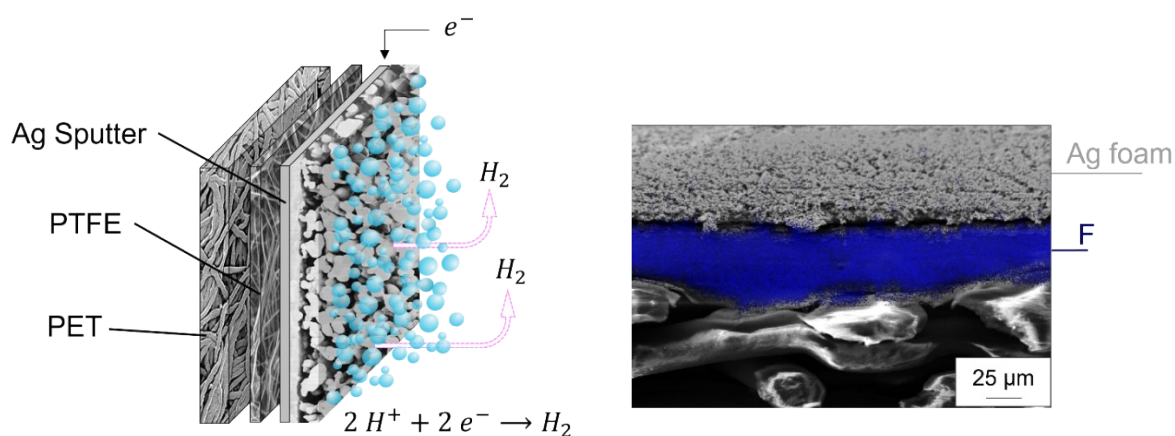

Figure 5: Graphical representation of the Dynamic Hydrogen Bubble Templatation process and the corresponding HER at the electrode surface (left) and SEM image of the resulting Ag foam on top of the polymer substrate (right).

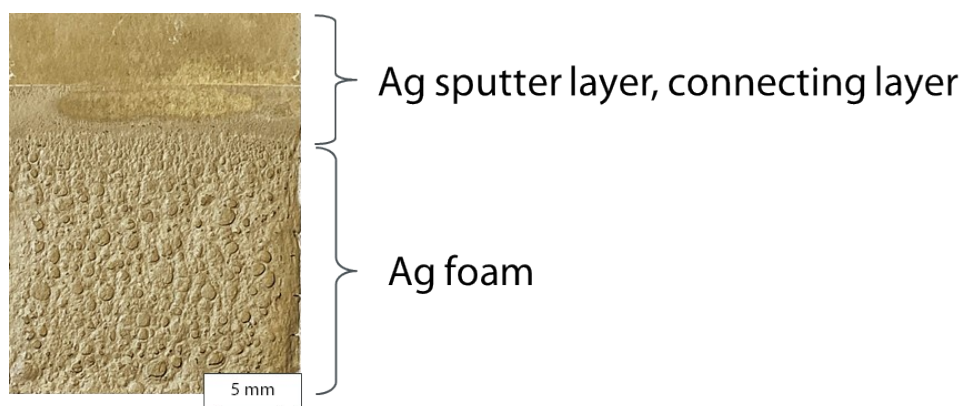

Figure 6: Image of a DHBT foam GDE.

Table 1: Values generated by physisorption measurements and capillary flow porometry for each sample.

| Parameter             | Unit                       | PET-PTFE | Ag-Sputter | DHBT Foam | Ionomer-infiltrated |
|-----------------------|----------------------------|----------|------------|-----------|---------------------|
| BET                   | $\text{m}^2\text{g}^{-1}$  | 0.69     | 0.85       | 0.88      | 0.35                |
| Maximum Pore Size     | $\mu\text{m}$              | 0.8974   | 0.3886     | 0.3925    | 0.4244              |
| Mean Pore Size        | $\mu\text{m}$              | 0.1492   | 0.1581     | 0.2426    | 0.2403              |
| Minimum Pore Size     | $\mu\text{m}$              | 0.1004   | 0.1145     | 0.2297    | 0.2045              |
| Bubble Point Pressure | bar                        | 0.7132   | 1.647      | 1.6307    | 1.5078              |
| BubblePoint Flow Rate | $\text{Lm}^{-1}$           | 0.1398   | 0.4013     | 0.3052    | 0.1054              |
| Pore Volume           | $\text{cm}^3\text{g}^{-1}$ | 34.49    | 37.57      | 37.72     | 20.76               |
| Sample Thickness      | $\mu\text{m}$              | 189      | 200        | 280       | 294                 |
| Sample Weight         | g                          | 0.0268   | 0.0268     | 0.04647   | 0.05116             |

Analysis before and after long term CO<sub>2</sub>RR operation

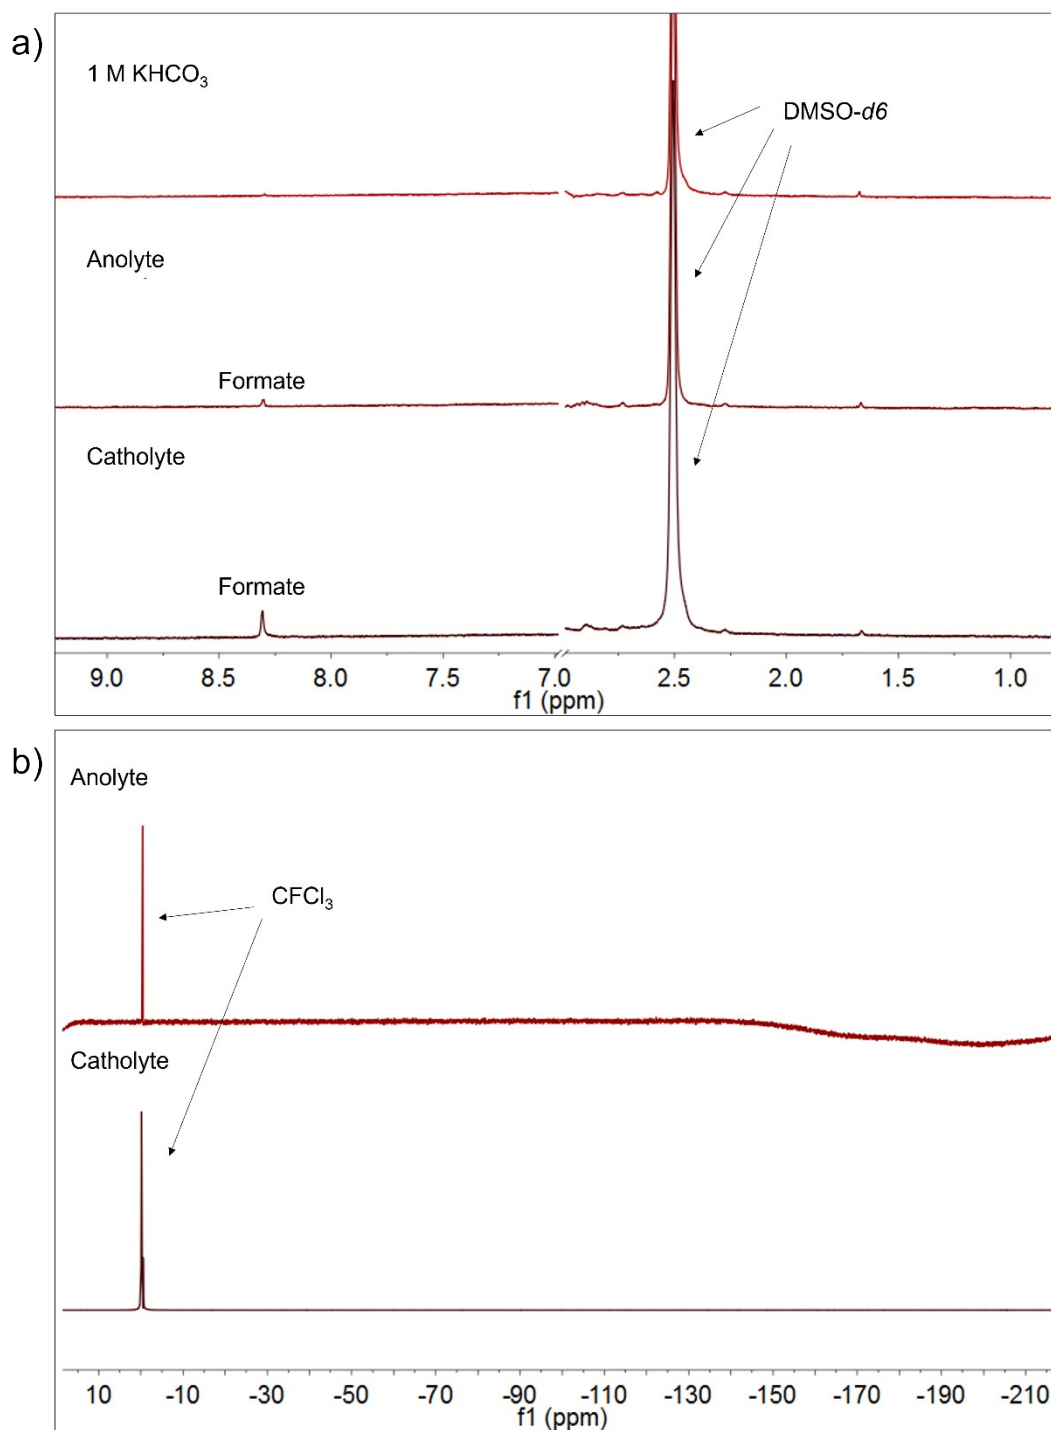

Figure 7: <sup>1</sup>H NMR spectra of the electrolytes (in DMSO-*d*<sub>6</sub>) compartments and <sup>19</sup>F NMR spectra of the electrolytes (in DMSO-*d*<sub>6</sub>) after the long term stability test of the DHBT-GDE.

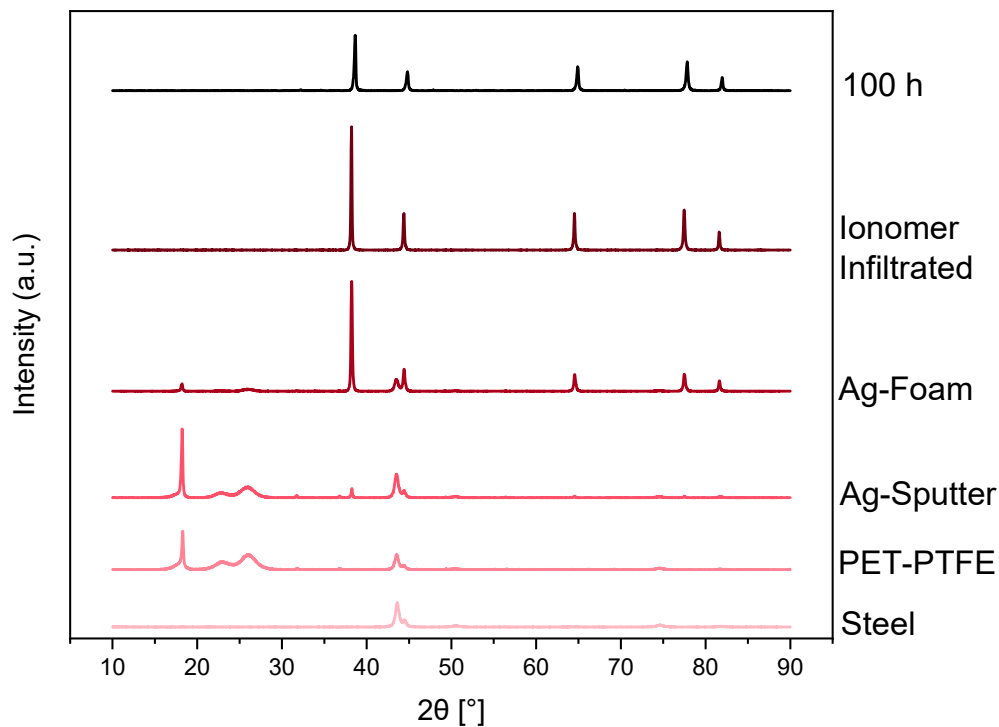

Figure 8: XRD pattern of the reference steel plate, PTFE-PET substrate, the Ag sputter layer, the Ag DHBT foam, the ionomer infiltrated GDE and the tested DHBT GDE after 100 h of CO<sub>2</sub>RR operation.

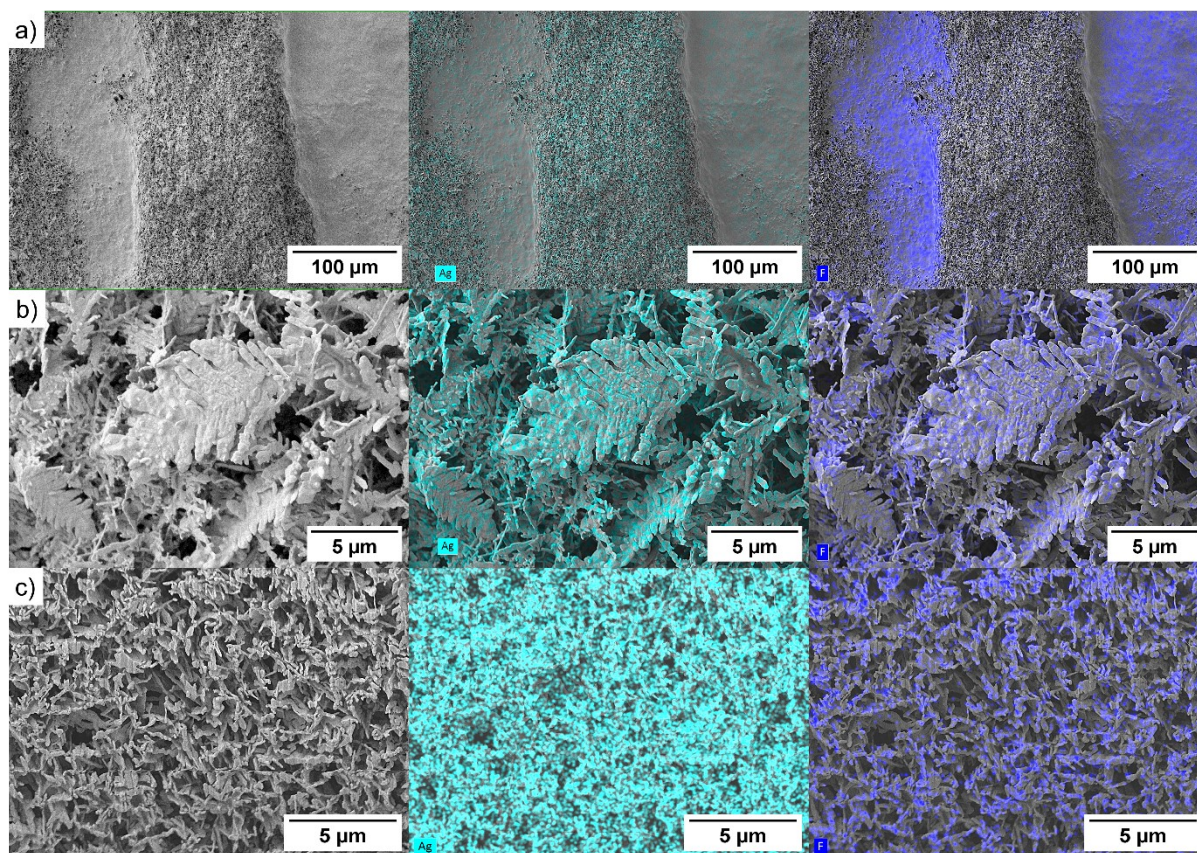

Figure 9: SEM images including EDS analysis of the Ag and F distribution on a pristine perfluorinated GDE. (a) Top down view, (b) zoomed-in view of the surface and (c) high resolution view of the nano-porous foam walls.

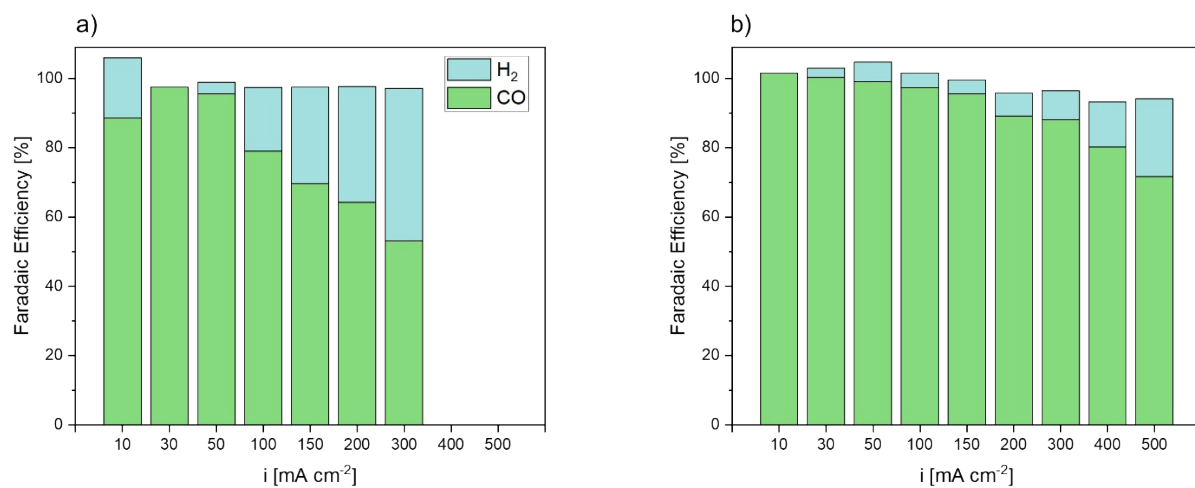

Figure 10: Faradaic efficiencies of CO and H<sub>2</sub> after galvanostatic operation at current densities up to 500 mA cm<sup>-2</sup>. (a) CO<sub>2</sub>RR results of a commercial Covestro GDE and (b) CO<sub>2</sub>RR results of the Ag DHBT GDE.

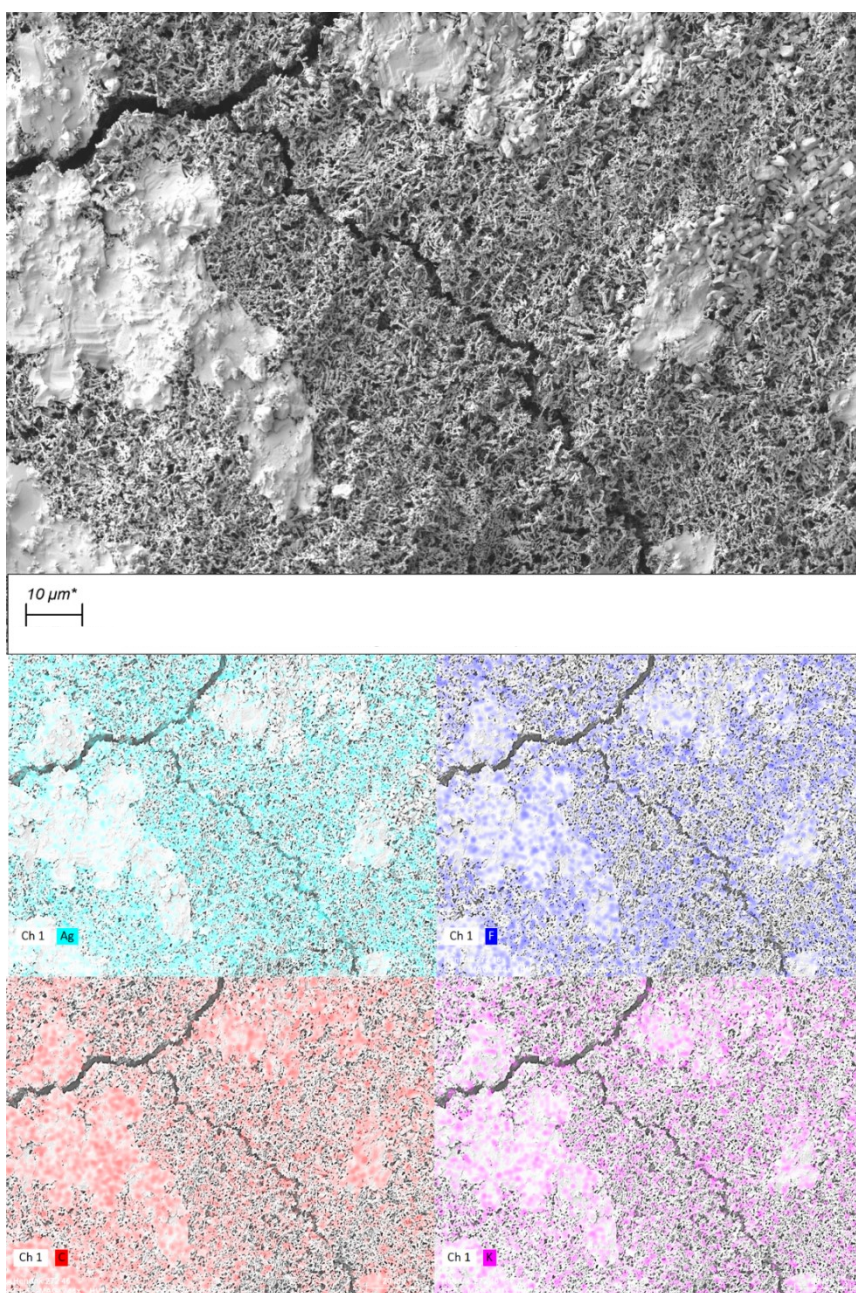

Figure 11: Top view SEM images (a) and EDS mapping analysis of Ag, F, C and K (b) of the Ag DHBT electrode after long-term  $\text{CO}_2\text{RR}$  operation at  $200 \text{ mAcm}^{-2}$  for 100 h.

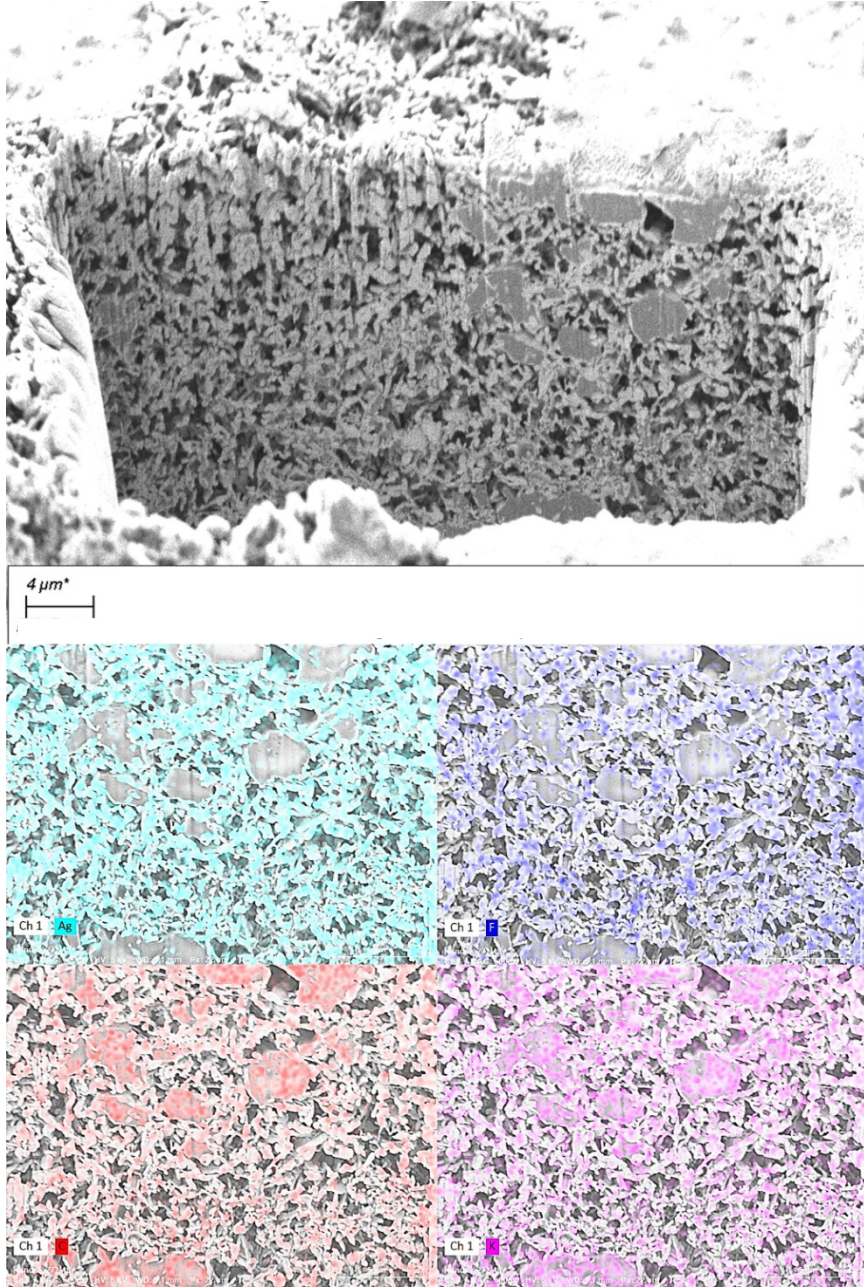

Figure 12: FIB cut view SEM images (a) and EDS mapping analysis of Ag, F, C and K (b) of the Ag DHBT electrode after long-term CO<sub>2</sub>RR operation at 200 mAcm<sup>-2</sup> for 100 h.

Proposed reaction mechanism of the combined proton and electron donation step and the following splitting reaction based on work by Rosen et al <sup>1</sup>.

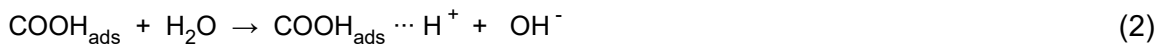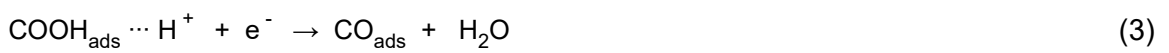

Table 2: Summary of CO<sub>2</sub>RR long term performances for Ag electrodes in neutral and basic media.

| Catalyst     | Electrolytes          | Current Density [mA/cm <sup>2</sup> ] | Faradaic Efficiency [%] | Stability [h] | Reference                            |
|--------------|-----------------------|---------------------------------------|-------------------------|---------------|--------------------------------------|
| Ag/PFSA      | 1 M KHCO <sub>3</sub> | 200                                   | > 95                    | 100           | This work                            |
| Ag/PFSA      | 1 M KHCO <sub>3</sub> | 500                                   | > 75                    | 1             | This work                            |
| C/Ag/PTFE    | 1 M KHCO <sub>3</sub> | 160                                   | > 90                    | 100           | Dinh et al. <sup>2</sup>             |
| C/Ag/PTFE    | 1M KOH                | 150                                   | > 90                    | 100           | Dinh et al. <sup>2</sup>             |
| Ag + Ionomer | 1 M KHCO <sub>3</sub> | 250                                   | > 60                    | n. a.         | García de Arquer et al. <sup>3</sup> |
| Ag + Ionomer | 1 M KHCO <sub>3</sub> | 320                                   | > 55                    | n. a.         | García de Arquer et al. <sup>3</sup> |
| Ag           | 2 M KHCO <sub>3</sub> | 27                                    | 96                      | 15            | Monti et al. <sup>4</sup>            |
| Ag           | 1 M KOH               | 365                                   | 99                      | n. a.         | Monti et al. <sup>4</sup>            |
| Ag/PTFE      | 1 M KOH               | 300                                   | 84                      | 10            | Gabardo et al. <sup>5</sup>          |
| Ag           | 1 M KHCO <sub>3</sub> | 100                                   | 97                      | 41            | Senocrate et al. <sup>6</sup>        |
| Ag           | 1 M KHCO <sub>3</sub> | 200                                   | > 90                    | n. a.         | Sassenburg et al. <sup>7</sup>       |

## References

1. Rosen, J. et al. Mechanistic Insights into the Electrochemical Reduction of CO<sub>2</sub> to CO on Nanostructured Ag Surfaces. *ACS Catal.* **5**, 4293–4299; 10.1021/acscatal.5b00840 (2015).
2. Dinh, C.-T., García de Arquer, F. P., Sinton, D. & Sargent, E. H. High Rate, Selective, and Stable Electroreduction of CO<sub>2</sub> to CO in Basic and Neutral Media. *ACS Energy Lett.* **3**, 2835–2840; 10.1021/acsenergylett.8b01734 (2018).
3. García de Arquer, F. P. et al. CO<sub>2</sub> electrolysis to multicarbon products at activities greater than 1 A cm<sup>-2</sup>. *Science (New York, N.Y.)* **367**, 661–666; 10.1126/science.aay4217 (2020).
4. Monti, N. B. D. et al. Facile Fabrication of Ag Electrodes for CO<sub>2</sub> -to-CO Conversion with Near-Unity Selectivity and High Mass Activity. *ACS Appl. Energy Mater.* **5**, 14779–14788; 10.1021/acsaem.2c02143 (2022).
5. Gabardo, C. M. et al. Combined high alkalinity and pressurization enable efficient CO<sub>2</sub> electroreduction to CO. *Energy Environ. Sci.* **11**, 2531–2539; 10.1039/C8EE01684D (2018).
6. Senocrate, A. et al. Importance of Substrate Pore Size and Wetting Behavior in Gas Diffusion Electrodes for CO<sub>2</sub> Reduction. *ACS Appl. Energy Mater.* **5**, 14504–14512; 10.1021/acsaem.2c03054 (2022).
7. Sassenburg, M. et al. Characterizing CO<sub>2</sub> Reduction Catalysts on Gas Diffusion Electrodes: Comparing Activity, Selectivity, and Stability of Transition Metal Catalysts. *ACS Appl. Energy Mater.* **5**, 5983–5994; 10.1021/acsaem.2c00160 (2022).
